# Supplementary material for: Copper(ii) complexes derived from naphthalene-based halogenated Schiff bases: synthesis, structural analysis, DFT computational studies and in vitro biological activities
Source: Royal Society of Chemistry journal article supplement (doi:10.1039/d4nj01621a), 2024-01-01
Supplement: d4nj01621a1.pdf [file d4nj01621a1.pdf]

## Copper(II) complexes derived from naphthalene-based halogenated Schiff bases: Synthesis, structural analysis, DFT computational studies and *in vitro* biological activities

Segun D. Oladipo,<sup>a,b\*</sup> Robert C. Luckay,<sup>a\*</sup>

<sup>a</sup>Department of Chemistry and Polymer Science, Stellenbosch University, Private Bag X1, Matieland 7602, South Africa

<sup>b</sup>Department of Chemical Sciences, Olabisi Onabanjo University, P.M.B 2002, Ago-Iwoye, Nigeria.

\*Corresponding authors: Dr S. D. Oladipo ([segun.oladipo@oouagoiwoye.edu.ng](mailto:segun.oladipo@oouagoiwoye.edu.ng)) and Prof. R.C. Luckay ([rluckay@sun.ac.za](mailto:rluckay@sun.ac.za))

### Supplementary information

Table of contents

| Figures                                                                                  | Page |
|------------------------------------------------------------------------------------------|------|
| Figure S1: FT-IR spectrum for <b>L1</b>                                                  | 2    |
| Figure S2: FT-IR spectrum for <b>L2</b>                                                  | 3    |
| Figure S3: FT-IR spectrum for <b>1</b>                                                   | 4    |
| Figure S4: FT-IR spectrum for <b>2</b>                                                   | 5    |
| Figure S5: <sup>1</sup> H-NMR spectrum for <b>L1</b>                                     | 6    |
| Figure S6: <sup>13</sup> C-NMR spectrum for <b>L1</b>                                    | 7    |
| Figure S7: <sup>1</sup> H-NMR spectrum for <b>L2</b>                                     | 8    |
| Figure S8: <sup>13</sup> C-NMR spectrum for <b>L2</b>                                    | 9    |
| Figure S9: EPR spectrum for <b>2</b>                                                     | 9    |
| Figure S10: EPR spectrum for <b>1</b>                                                    | 10   |
| Figure S11: Mass spectrum for <b>L1</b>                                                  | 10   |
| Figure S12: Mass spectrum for <b>L2</b>                                                  | 11   |
| Figure S13: Mass spectrum for <b>1</b>                                                   | 11   |
| Figure S14: Mass spectrum for <b>2</b>                                                   | 12   |
| Figure S15: Optimized structures for <b>L1</b> , <b>L2</b> , <b>1</b> and <b>2</b>       | 12   |
| Figure S16: Electronic absorption spectra of <b>1</b> and <b>2</b> at high concentration | 13   |

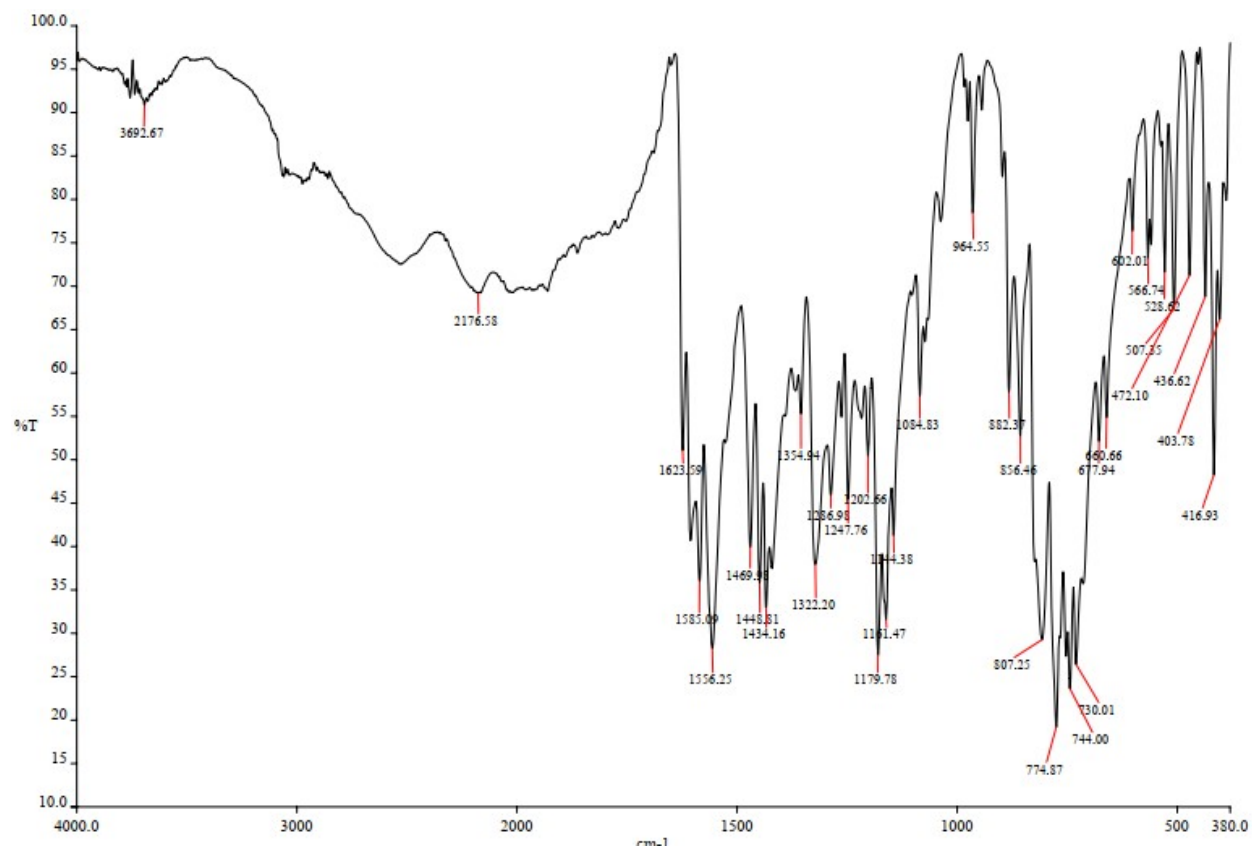

**Figure S1: IR Spectrum of L1**

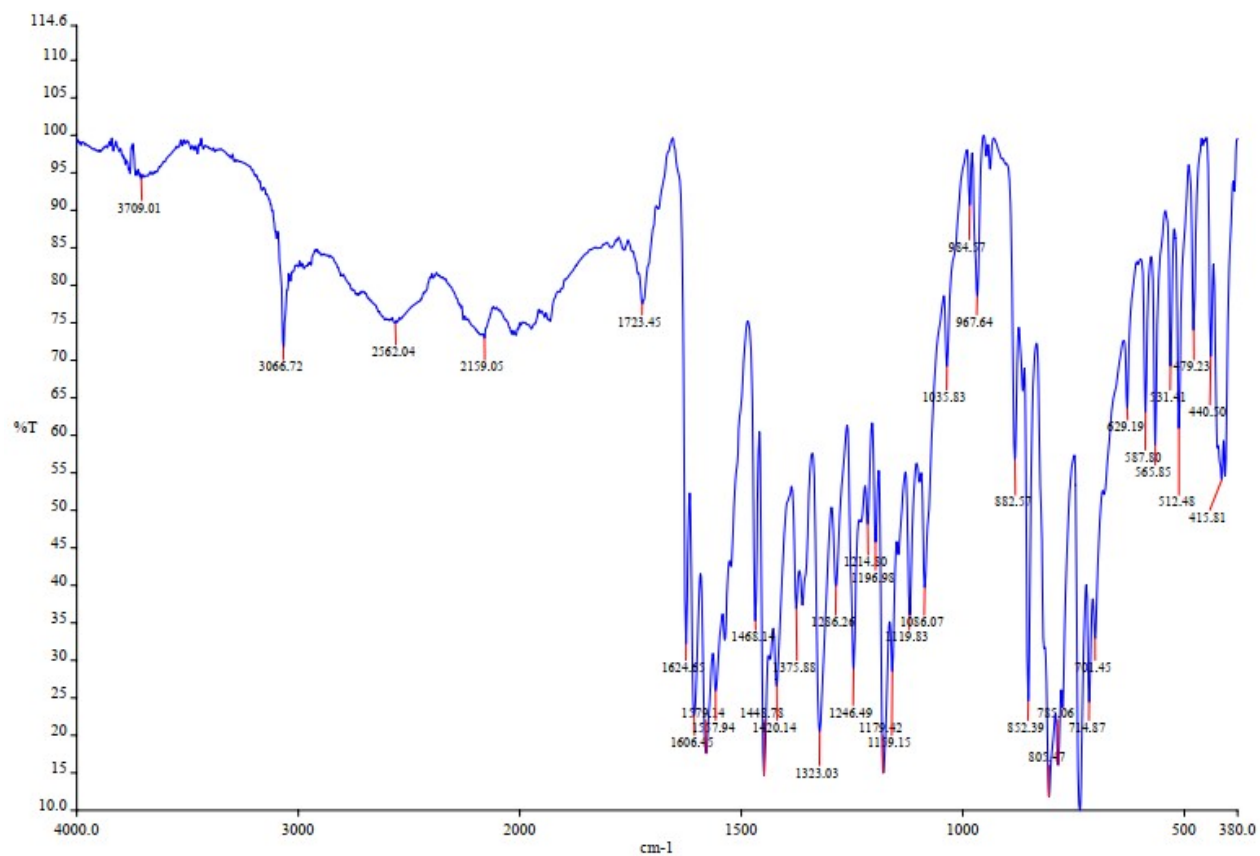

**Figure S2: IR Spectrum of L2**

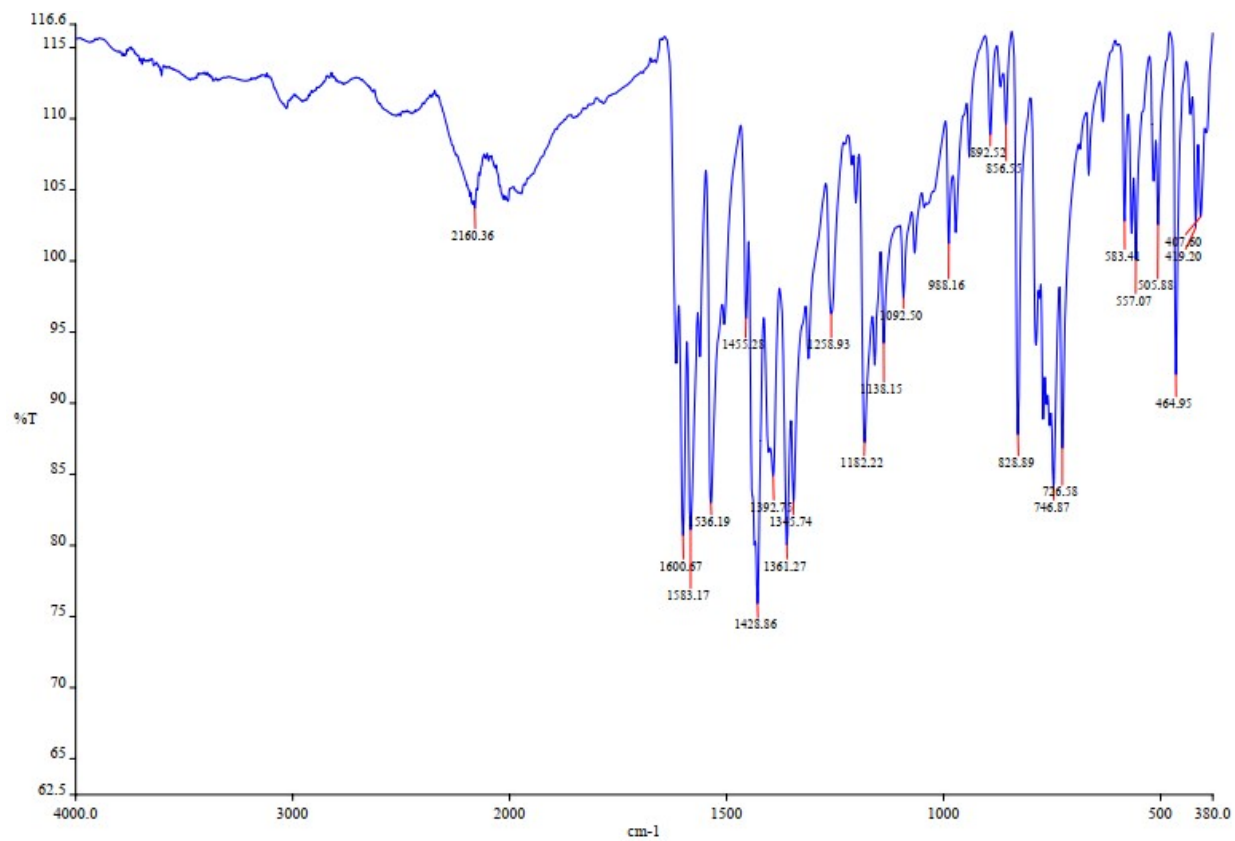

**Figure S3:** IR Spectrum of **1**

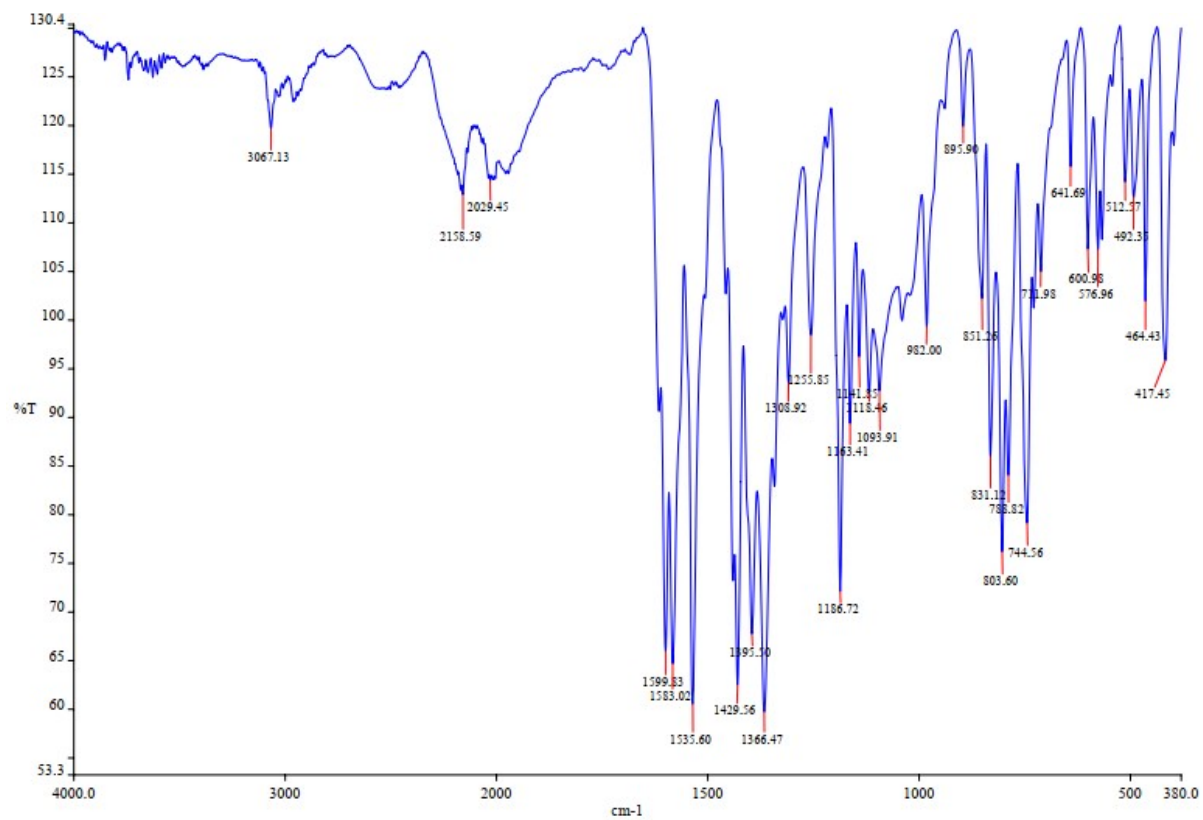

**Figure S4: IR Spectrum of 2**

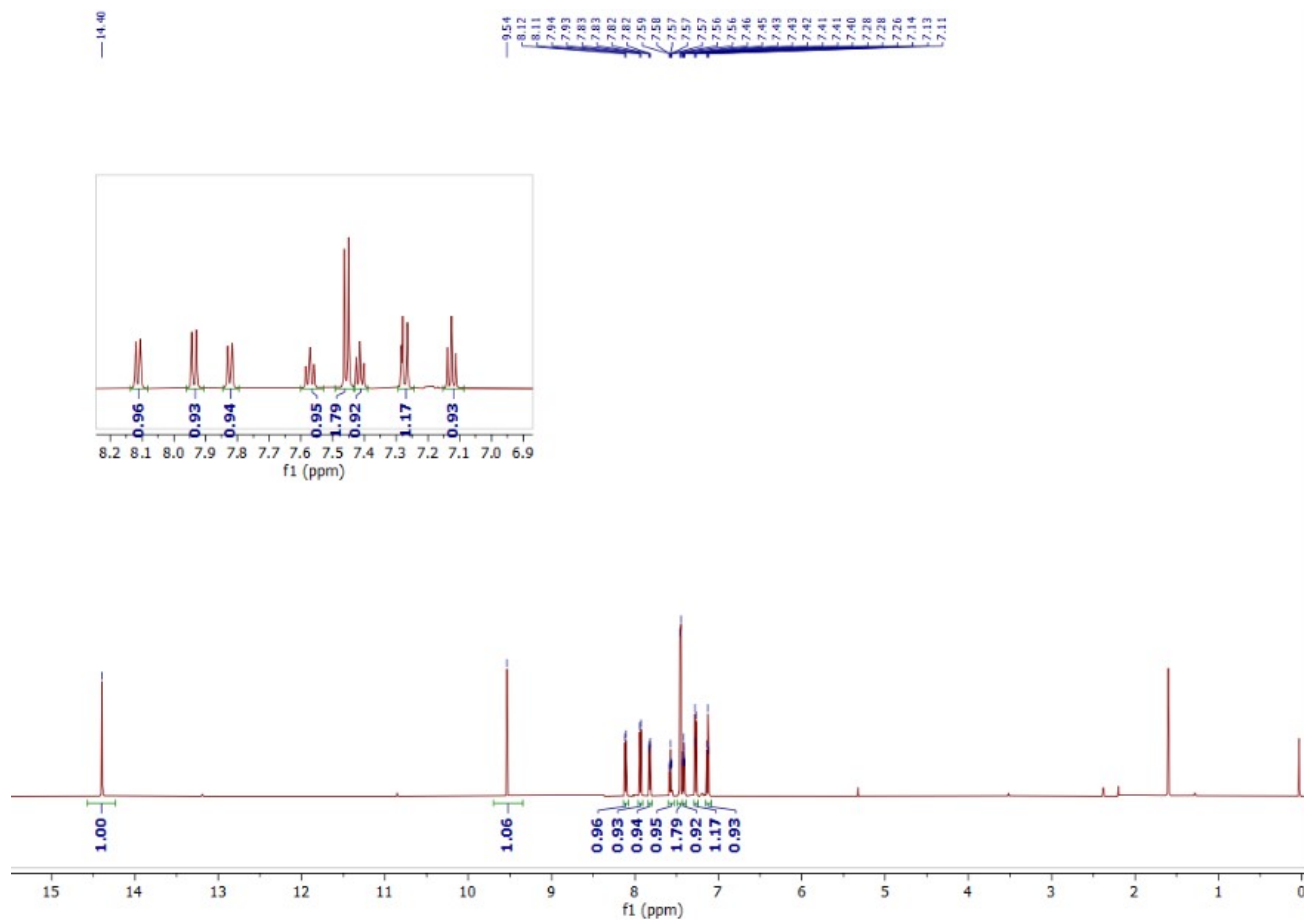

**Figure S5:**  $^1\text{H-NMR}$  Spectrum of L1

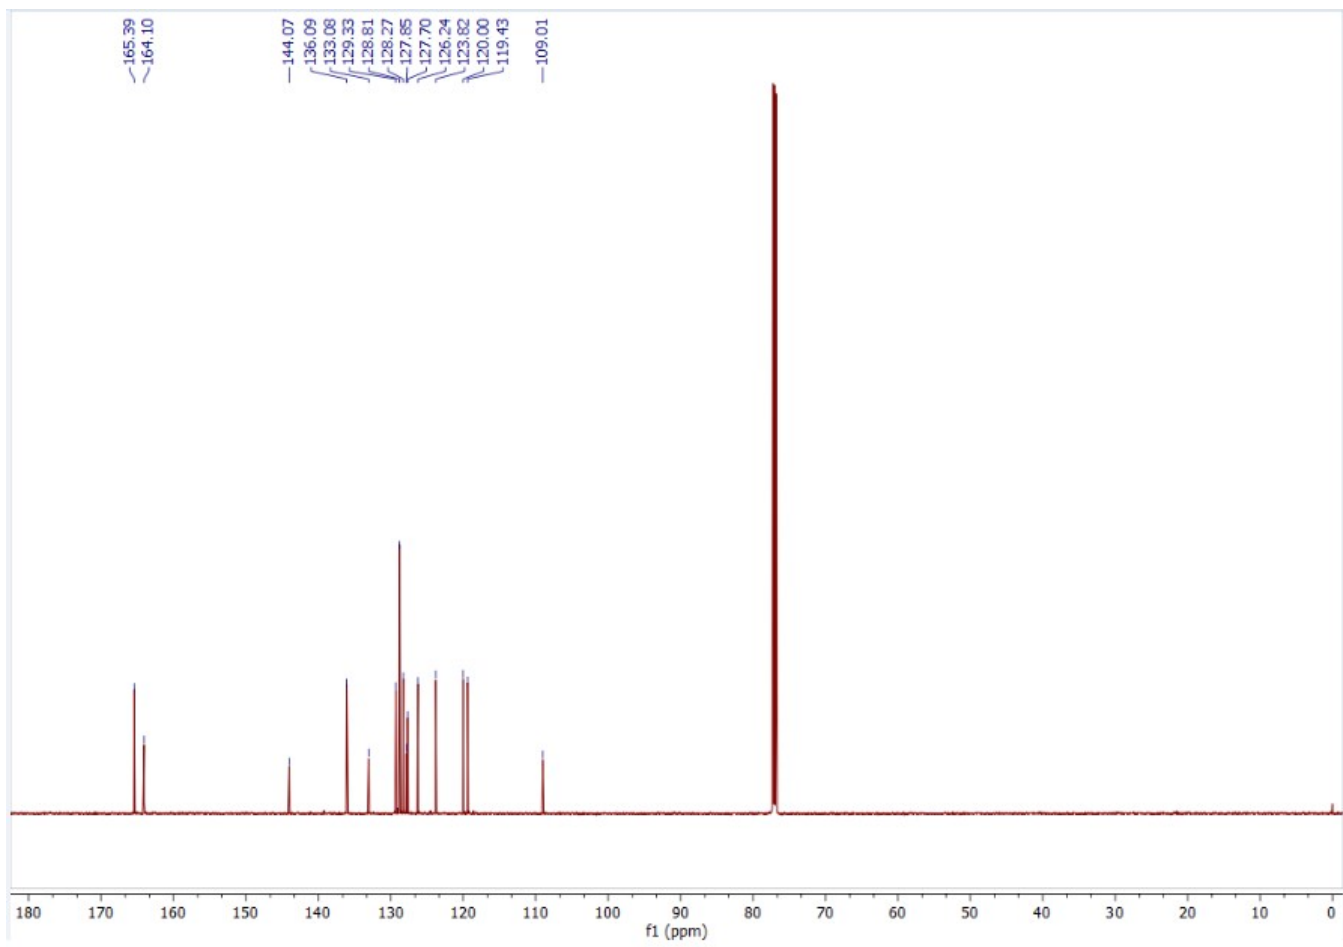

**Figure S6:**  $^{13}\text{C}$ -NMR Spectrum of L1

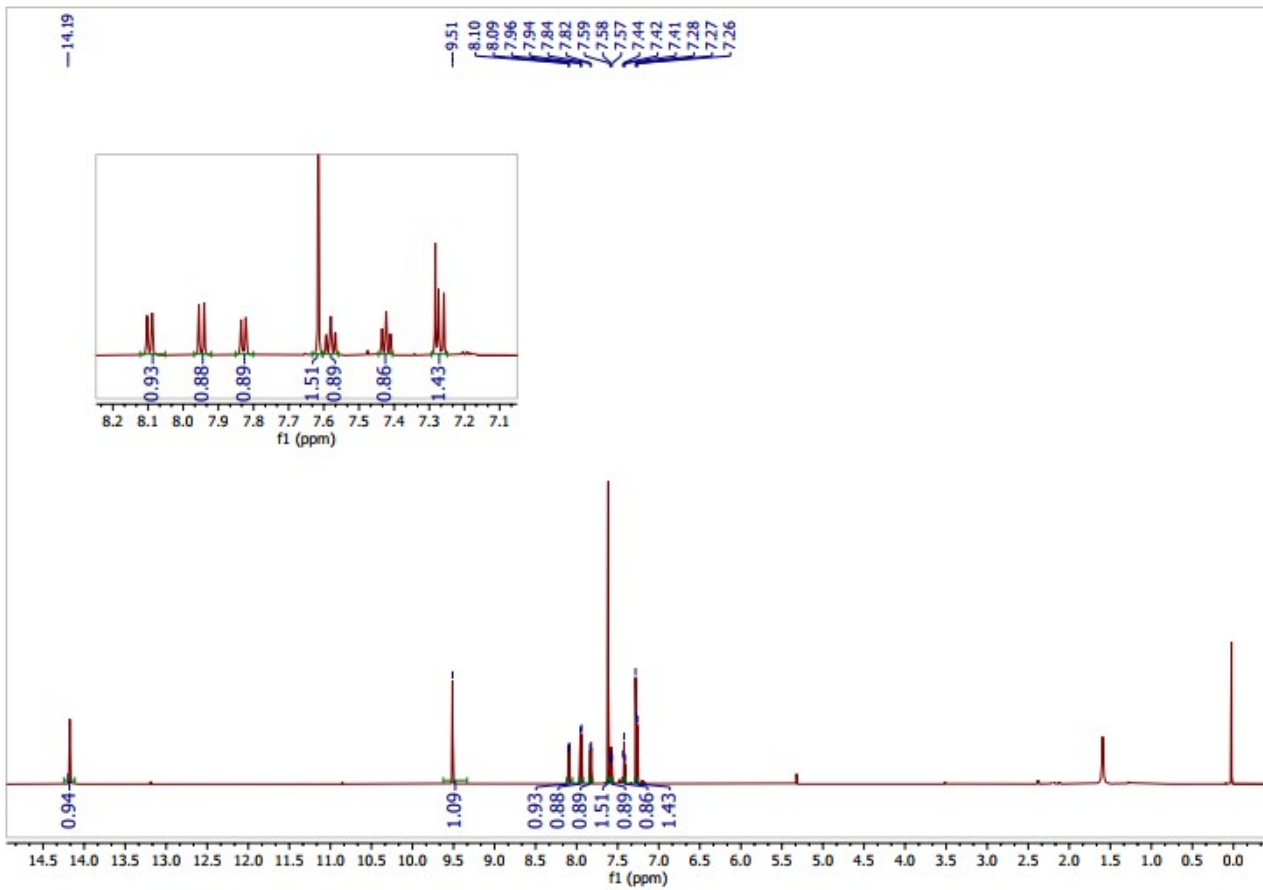

Figure S7: <sup>1</sup>H-NMR Spectrum of L2



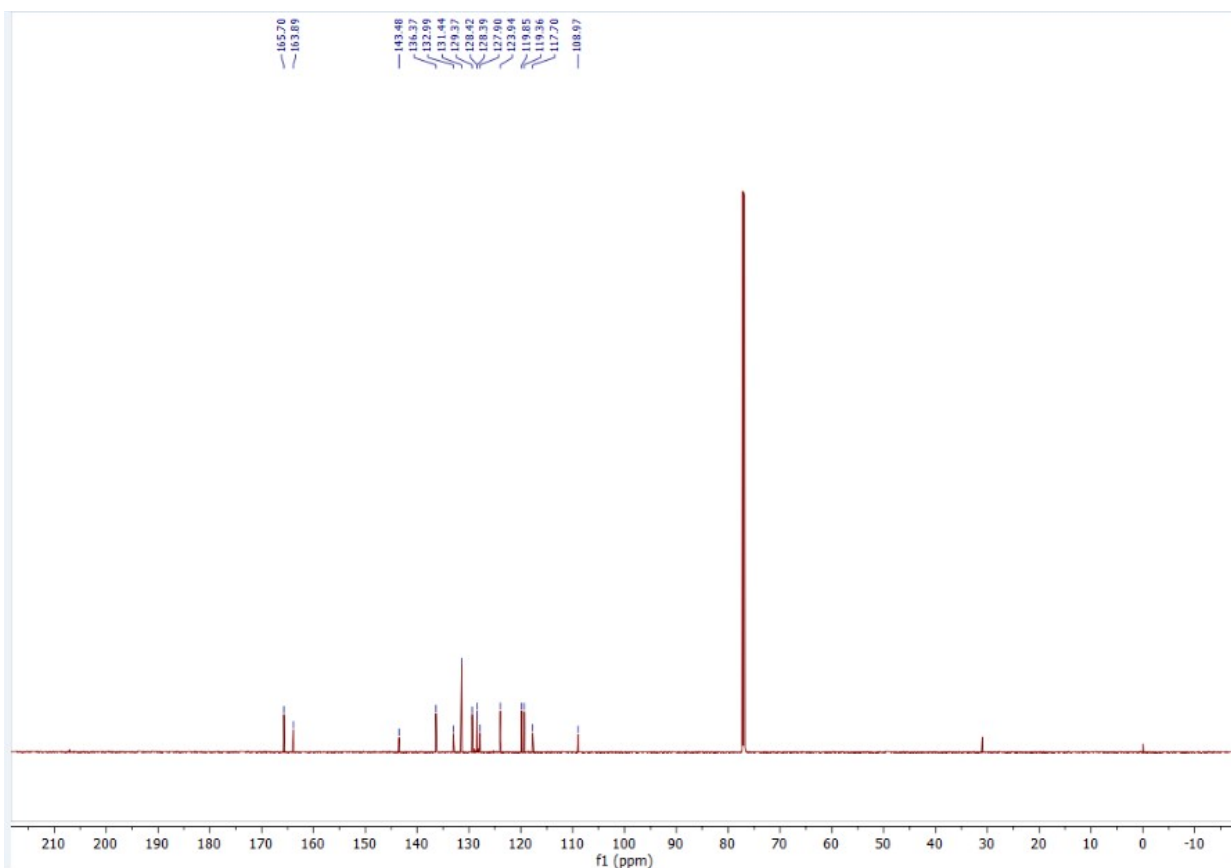

Figure S8:  $^{13}\text{C}$ -NMR Spectrum of L2

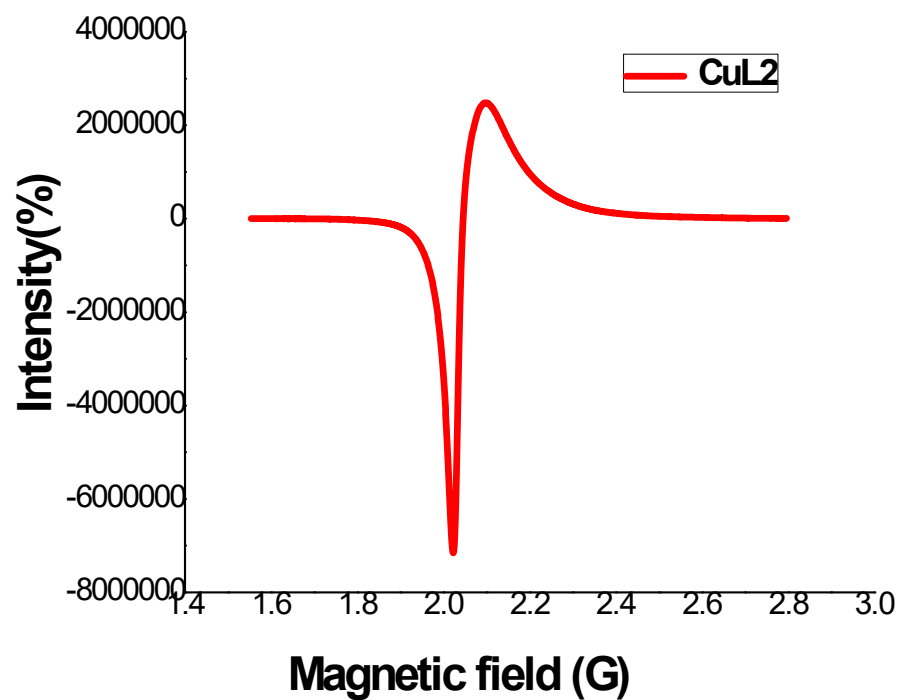

Figure S9: EPR of 2

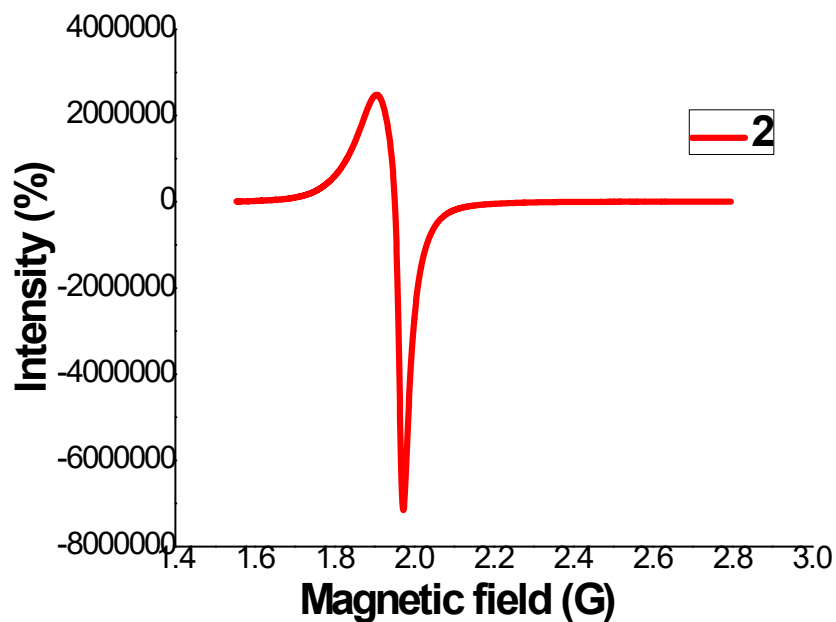

Figure S10: EPR of 1

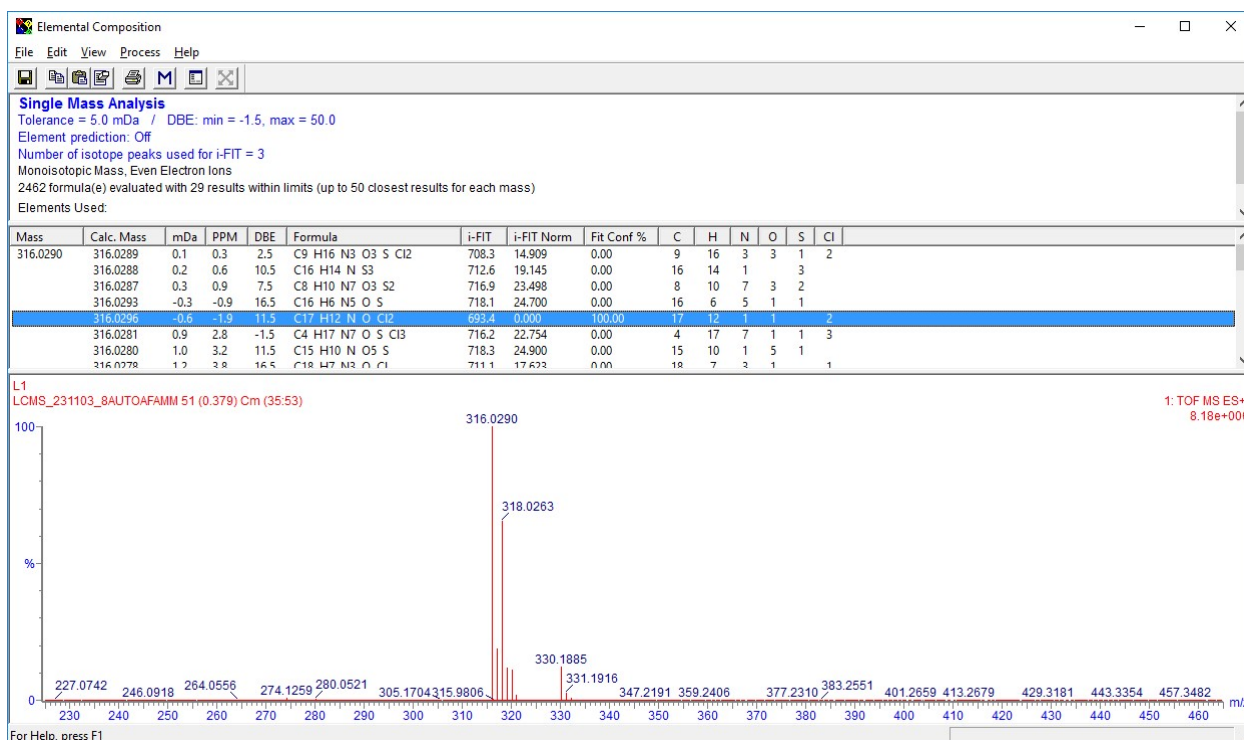

Figure S11: Mass spectrum for L1

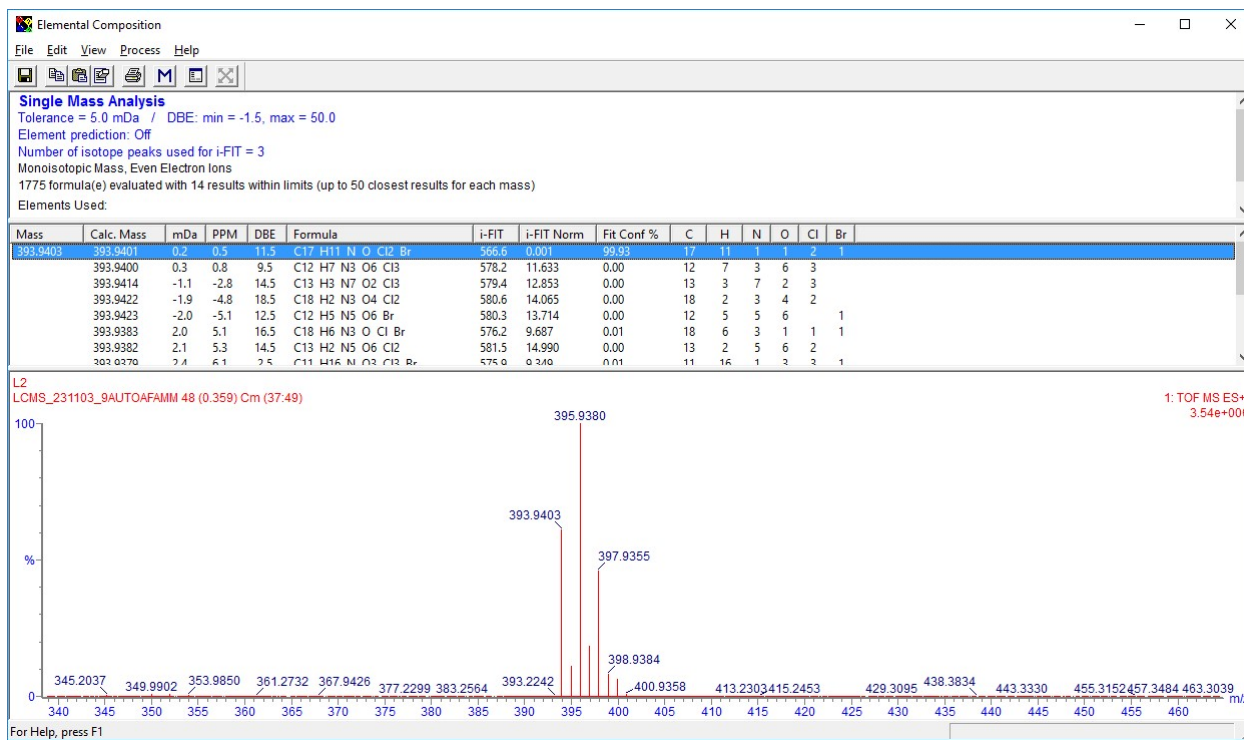

Figure S12: Mass spectrum for L2

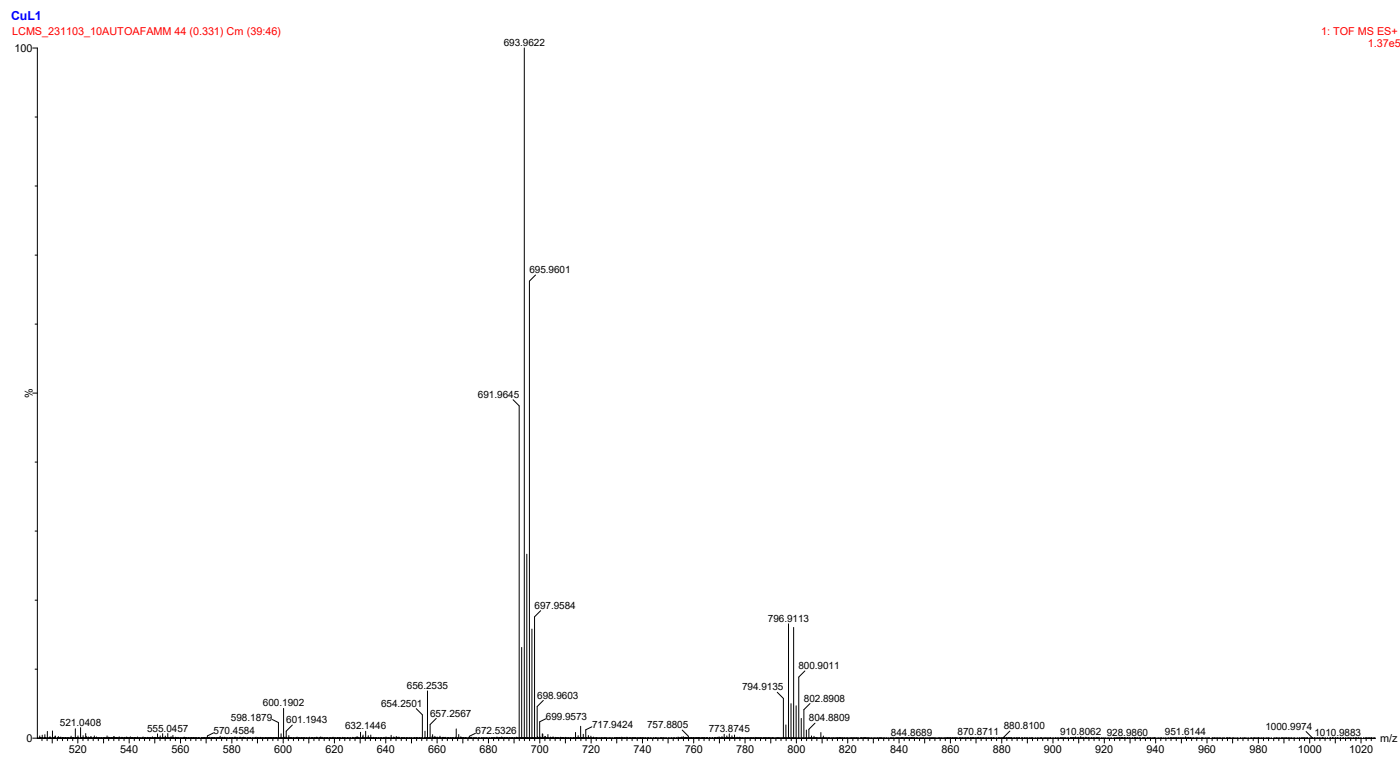

Figure S13: Mass spectrum for complex 1

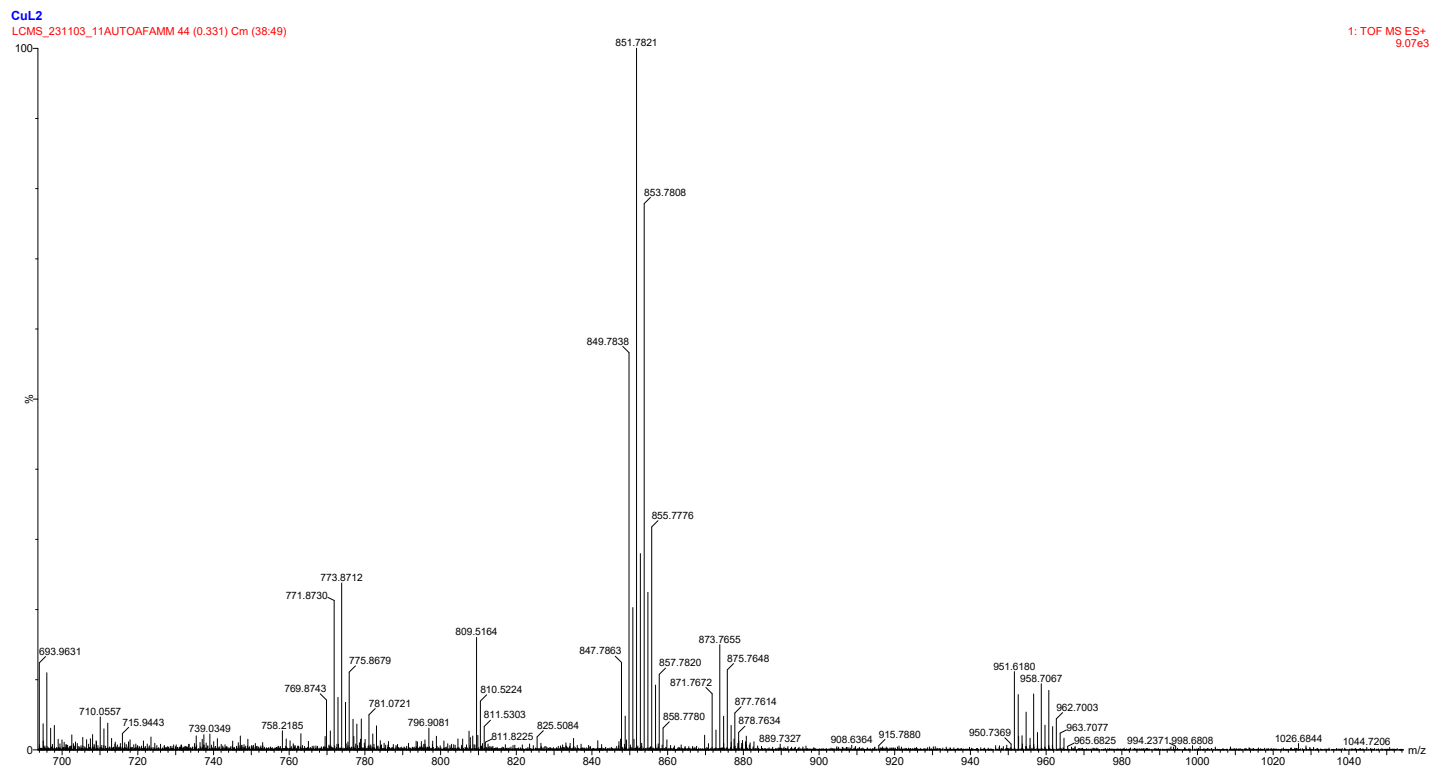

**Figure S14:** Mass spectrum for complex 2

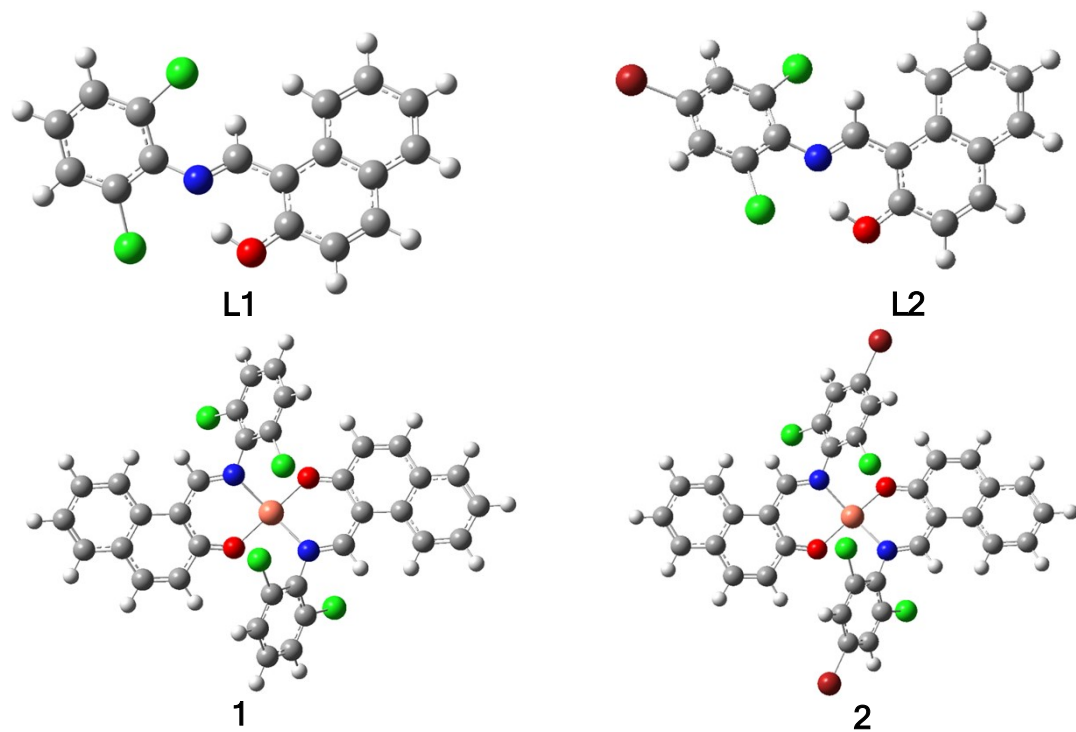

**Figure S15:** Optimized structures for L1, L2, 1 and 2

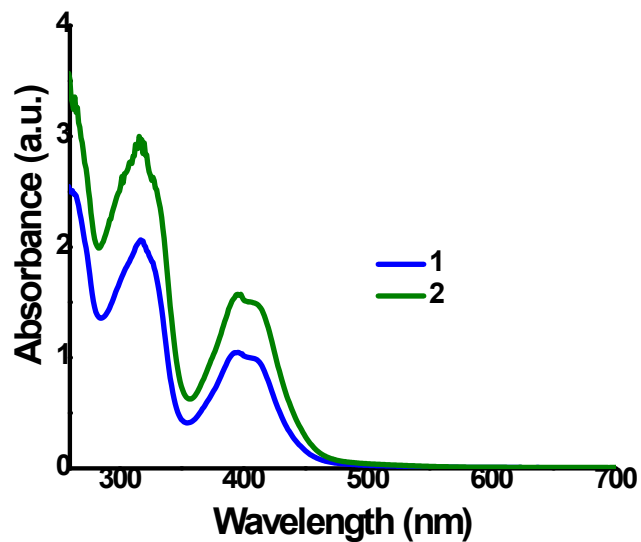

**Figure S16(a):** Electronic absorption spectra of **1** and **2** at high concentrations

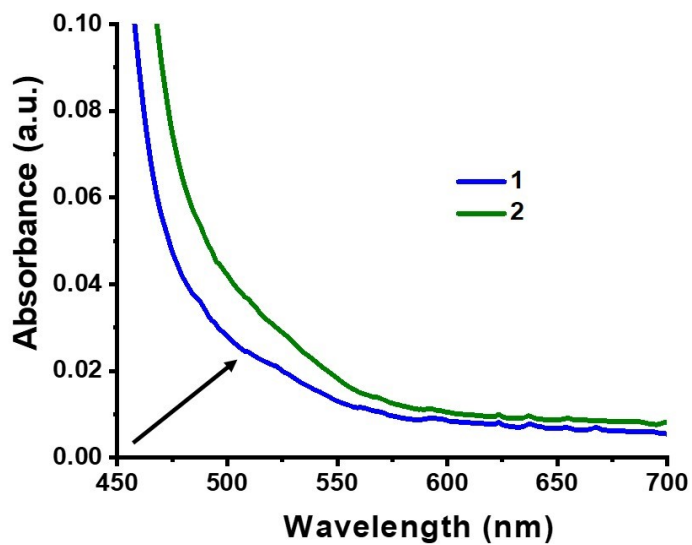

**Figure S16(b):** Electronic absorption spectra of **1** and **2** at high concentrations showing the weak  $d \rightarrow d$  transition.
